# Supplementary material for: Cardiac Function Evaluation after SARS-CoV-2 mRNA Vaccination in Children and Adolescents: A Prospective Speckle-Tracking Echocardiography Study
Source: MDPI journal article supplement (doi:10.3390/vaccines11081348), 2023-08-09
Supplement: s1 [file s1]

## Supplemental materials

### Material and Methods

**Table S1.** COVID-19 vaccines delivery timeline in the European and Italian pediatric population updated up to the end of June 2020 (end of the study).

| <u>Type of vaccine</u>                       | <u>Age group</u> | <u>EMA* authorization</u>         | <u>AIFA* authorization</u>        | <u>Primary regimen schedule and doses</u>               | <u>Extension of indication for use as a booster approved by AIFA</u>                                                                                                         |
|----------------------------------------------|------------------|-----------------------------------|-----------------------------------|---------------------------------------------------------|------------------------------------------------------------------------------------------------------------------------------------------------------------------------------|
| <b>Cominarty (BioNTech/Pfizer's vaccine)</b> | 16 and older     | December, 21th, 2020 <sup>1</sup> | December, 22th, 2020 <sup>2</sup> | 30 mcg/dose, 2 doses cycle 21 days away from each other | December, 6th, 2021; 30 mcg/dose, independently from the previous type of vaccine administered, at least 4 months away from the completion of the primary cycle <sup>3</sup> |
| <b>Cominarty (BioNTech/Pfizer's vaccine)</b> | 12-15 years old  | May, 28 th, 2021 <sup>4</sup>     | June, 4 th, 2021 <sup>5</sup>     | 30 mcg/dose, 2 doses cycle 21 days away from each other | January, 5 th, 2022; 30 mcg/dose, independently from the previous type of vaccine administered, at least 4 months away from the completion of the primary cycle <sup>6</sup> |
| <b>Spikevax (previously</b>                  | 12-17 years old  | July, 23 th, 2021 <sup>7</sup>    | July, 29 th, 2021 <sup>8</sup>    | 100 mcg/dose, 2 doses                                   | Not approved                                                                                                                                                                 |

| <b>COVID-19 vaccine<br/>Moderna)</b>                              |                      |                                       |                                      | cycle 28<br>days away<br>from each<br>other                               |                     |
|-------------------------------------------------------------------|----------------------|---------------------------------------|--------------------------------------|---------------------------------------------------------------------------|---------------------|
| <b>Cominarty<br/>(BioNTech/Pfizer's<br/>vaccine)</b>              | 5-11<br>years<br>old | November, 25<br>th, 2021 <sup>9</sup> | December 1<br>st, 2021 <sup>10</sup> | 10<br>mcg/dose,<br>2 doses<br>cycle 21<br>days away<br>from each<br>other | <u>Not approved</u> |
| <b>Spikevax<br/>(previously<br/>COVID-19 vaccine<br/>Moderna)</b> | 5-11<br>years<br>old | <u>Not approved</u>                   | <u>Not approved</u>                  |                                                                           | <u>Not approved</u> |

\*European Medicines Agency (EMA); Agenzia Italiana del Farmaco (AIFA);

## References

- 1 First COVID-19 vaccine approved for children aged 12 to 15 in EU | European Medicines Agency, available at:  
<https://www.ema.europa.eu/en/medicines/human/EPAR/comirnaty#:~:text=Comirnaty%20received%20a%20conditional%20marketing,authorisation%20on%2010%20October%202022.>
- 2 La Commissione Tecnico Scientifica di AIFA (CTS) approva il vaccino BioNTech/Pfizer. Comunicato AIFA n. 620 22 dicembre 2020, available at  
[https://www.aifa.gov.it/documents/20142/0/Comunicato%20AIFA%20n.%20620%20-%20Autorizzato%20il%20vaccino%20BioNTech%20Pfizer.%20Sul%20sito%20AIFA%20risposte%20alle%20domande%20pi%C3%B9%20frequenti\(1\).pdf](https://www.aifa.gov.it/documents/20142/0/Comunicato%20AIFA%20n.%20620%20-%20Autorizzato%20il%20vaccino%20BioNTech%20Pfizer.%20Sul%20sito%20AIFA%20risposte%20alle%20domande%20pi%C3%B9%20frequenti(1).pdf)
- 3 La Commissione Tecnico Scientifica di AIFA (CTS) approva la dose booster con il vaccino Comirnaty per la fascia di età a partire dai 16 anni. Available at  
<https://www.trovanorme.salute.gov.it/norme/renderNormsanPdf?anno=2021&codLeg=84077&parte=1%20&serie=null>
- 4 First COVID-19 vaccine approved for children aged 12 to 15 in EU | European Medicines Agency. <https://www.ema.europa.eu/en/news/first-covid-19-vaccine-approved-children-aged-12-15-eu>
- 5 La Commissione Tecnico Scientifica di AIFA (CTS) approva l'utilizzo del vaccino Comirnaty per la fascia di età 12-15 anni. Comunicato AIFA n. 647 31 maggio 2021, available at  
[https://www.aifa.gov.it/documents/20142/1289678/Comunicato\\_stampAIFA\\_n.647.pdf](https://www.aifa.gov.it/documents/20142/1289678/Comunicato_stampAIFA_n.647.pdf)
- 6 La Commissione Tecnico Scientifica di AIFA (CTS) approva la dose booster con il vaccino Comirnaty per la fascia di età 12-15 anni. Comunicato AIFA n. 681 5 gennaio 2022, available at  
[https://www.aifa.gov.it/documents/20142/1618244/Comunicato\\_AIFA\\_N.681.pdf](https://www.aifa.gov.it/documents/20142/1618244/Comunicato_AIFA_N.681.pdf)

7 COVID-19 vaccine Spikevax approved for children aged 12 to 17 in EU | European Medicines Agency. Accessed February 4, 2022

<https://www.ema.europa.eu/en/news/covid-19-vaccine-spikevax-approved-children-aged-12-17-eu>

8 La Commissione Tecnico Scientifica di AIFA (CTS) approva l'utilizzo del vaccino Spikevax (Moderna) per la fascia di età 12-17 anni. Comunicato AIFA n. 656 28 luglio 2021, available at [https://www.aifa.gov.it/documents/20142/1289678/Comunicato\\_AIFA\\_656.pdf](https://www.aifa.gov.it/documents/20142/1289678/Comunicato_AIFA_656.pdf)

9 Comirnaty COVID-19 vaccine: EMA recommends approval for children aged 5 to 11 | European Medicines Agency. Accessed February 4, 2022.

<https://www.ema.europa.eu/en/news/comirnaty-covid-19-vaccine-ema-recommends-approval-children-aged-5-11>

10 La Commissione Tecnico Scientifica di AIFA (CTS) approva il vaccino Comirnaty per la fascia di età 5-11 anni. Comunicato AIFA n. 674 1 dicembre 2021, available at

[https://www.aifa.gov.it/documents/20142/1289678/Comunicato\\_AIFA\\_674.pdf](https://www.aifa.gov.it/documents/20142/1289678/Comunicato_AIFA_674.pdf)
